# Supplementary material for: Health in overweight children: 2-year follow-up of Finnmark Activity School—a randomised trial
Source: PubMed Central journal article supplement — Arch Dis Child. 2014 Nov 20;100(5):441–8. doi: 10.1136/archdischild-2014-307107 (PMC4413858; doi:10.1136/archdischild-2014-307107), 2014-11-20
Supplement: archdischild-2014-307107-s1.pdf [file archdischild-2014-307107-s1.pdf]

**Table A1 Changes in self reported mental health (SDQ) through 24 months; by treatment group and pooled. Finnmark Activity School**

| Self reported SDQ score*         | Change at follow up(95 % CI)<br>Single-family intervention | Change at follow up (95% CI)<br>Multiple-family intervention | Between group difference<br>(95% CI) | P value<br>group by<br>time <sup>†</sup> |
|----------------------------------|------------------------------------------------------------|--------------------------------------------------------------|--------------------------------------|------------------------------------------|
| <b>Prosocial behaviour</b>       |                                                            |                                                              |                                      |                                          |
| 6 months                         | 0.12 (-0.83 to 1.06)                                       | 0.08(-0.95 to 1.11 )                                         | -0.04 (-1.43 to 1.37)                | 0.958                                    |
| 12 months                        | 0.16 (-0.68 to 0.99)                                       | 0.51(-0.33 to 1.35 )                                         | 0.35 (0.84 to 1.53)                  | 0.564                                    |
| 24 months                        | -0.60 (-1.45 to 0.26)                                      | 0.01(-0.85 to 0.87 )                                         | 0.61 (-0.60 to 1.82)                 | 0.324                                    |
| <b>Hyperactivity-inattention</b> |                                                            |                                                              |                                      |                                          |
| 6 months                         | 0,1 (-0,9 to 1,1)                                          | -0.48 (-1.61 to 0.65 )                                       | -0,58 (-2,10 to 0,93)                | 0.452                                    |
| 12 months                        | -0.28(-1.18 to 0.62)                                       | -0.32 ( -1.22 to0.58 )                                       | 0,03 (-1,31 to 1,24)                 | 0.959                                    |
| 24 months                        | -0,16 (-1,08 to 0,76)                                      | 0,12 (-0.8 to 1.05 )                                         | 0,28 (-1,02 to 1,59)                 | 0.670                                    |
| <b>Emotional symptoms</b>        |                                                            |                                                              |                                      |                                          |
| 6 months                         | -0.68(-1.62 to 0.27 )                                      | -0,85 (-1.92 to 0.22 )                                       | -0.18 (-1.6 to 1.25)                 | 0.810                                    |
| 12 months                        | -1.13(-1.99 to -0.28)                                      | -0.97 (-1.81 to -0.13 )                                      | 0.16 (-1.04 to 1.36 )                | 0.795                                    |
| 24 months                        | -0.74 ( -1.62 to 0.14)                                     | -0.60 (-1.47 to 0.27 )                                       | 0.14 (-1.1 to 1.38)                  | 0.828                                    |
| <b>Conduct problems</b>          |                                                            |                                                              |                                      |                                          |
| 6 months                         | -0.59 ( ` -1.32 to 0.15)                                   | -0.82 ( -1.61 to -0.02 )                                     | -0.23 (-1.31 to 0.85)                | 0.671                                    |
| 12 months                        | -0.67 ( ` -1.32 to -0.01)                                  | -0.68 ( -1.33 to -0.03 )                                     | -0.01 (-0.93 to 0.91)                | 0.979                                    |
| 24 months                        | -0.31 (-0.98 to 0.36)                                      | -0.40 (-1.08 to 0.26 )                                       | -0.09 (-1.04 to 0.86)                | 0.848                                    |
| <b>Peer problems</b>             |                                                            |                                                              |                                      |                                          |
| 6 months                         | -0.68(-1.61 to 0.25)                                       | -0.39 (-1.41 to 0.62 )                                       | 0.29 ( (-1.09 to 1.67)               | 0.681                                    |
| 12 months                        | -1.42 (-2.25 to -0.59)                                     | -0.24 (-1.06 to 0.59 )                                       | 1.19 ( -1.05 to 1.36)                | 0.048                                    |
| 24 months                        | -0.82 (-1,67 to 0.03)                                      | -0.67(-1.52 to 0.19)                                         | 0.15 (-1.05 to 1.36)                 | 0.804                                    |
| <b>Total difficulties</b>        |                                                            |                                                              |                                      |                                          |
| 6 months                         | -1.78(-4.11 to 0.54)                                       | -3.02(- 5.73 to -0.32 )                                      | -1.24 (-4.8 to 2.32)                 | 0.495                                    |
| 12 months                        | -3.43 (-5.53 to -1.32)                                     | -2.52 (-4.59 to -0.46)                                       | 0.90 (-2.05 to 3.85)                 | 0.549                                    |
| 24 months                        | -1.87 ( -4.05 to 3.85)                                     | -1.91 (-4.07 to 0.23 )                                       | -0.04 ( - 3.1 to 3.01)               | 0.977                                    |

| <b>SDQ Child Total score</b> | <b>Both treatment groups pooled( 95% KI)</b> | <b>P value -change from baseline</b> |
|------------------------------|----------------------------------------------|--------------------------------------|
| 3 months                     | -2.27 (-4.02 to -0.53)                       | 0.011                                |
| 12 months                    | -2.94 (-4.40 to - 1.47)                      | 0.000                                |
| 24 months                    | -1.89 (-3.41 to -0.37)                       | 0.015                                |

Data based on mixed models analysis with single-family intervention as reference group.

\* According to Norwegian version of Strength and Difficulty Questionnaire (23)

<sup>†</sup>P value for equality between groups, group-by-time effect

**Table A2 Changes in parent reported mental health (SDQ) through 24 months by treatment group and pooled. Finnmark Activity School.**

| <b>Parent reported SDQ score*</b> | <b>Change at follow up(95 % CI)<br/>Single-family intervention</b> | <b>Change at follow up(95 % CI)<br/>Multiple-family intervention</b> | <b>Between group difference<br/>(95% CI)</b> | <b>P value<br/>group by<br/>time<sup>†</sup></b> |
|-----------------------------------|--------------------------------------------------------------------|----------------------------------------------------------------------|----------------------------------------------|--------------------------------------------------|
| <b>Prosocial behaviour</b>        |                                                                    |                                                                      |                                              |                                                  |
| 6 months                          | 0.03 (-0.69 to 0.75)                                               | 0.25 ( -0.43 to 0.93 )                                               | 0.22 (-0.77 to 1.21)                         | 0.661                                            |
| 12 months                         | -0.02 (-0.56 to 0.60)                                              | 0 (-0.57 to 0.57 )                                                   | -0.02 (-0.83 to 0.80)                        | 0.966                                            |
| 24 months                         | 0.06 (-0.57 to 0.69)                                               | 0,39 (-0.19 to 0.97 )                                                | 0.33 (-0.53 to 1.18)                         | 0.450                                            |
| <b>Hyperactivity-inattention</b>  |                                                                    |                                                                      |                                              |                                                  |
| 6 months                          | -0.1 (-0.78 to 0.58)                                               | -0.07 (0.71 to 0.57 )                                                | 0.03 (-0.91 to 0.96)                         | 0.954                                            |
| 12 months                         | 0.02 (-0.53 to 0.57)                                               | -0.18 (-0.71 to 0.36 )                                               | -0.20 (-0.96 to 0.57)                        | 0.611                                            |
| 24 months                         | -0.49 (-1.09 to 0.10)                                              | -0.44 (-0.99 to 0.10 )                                               | 0.05 (-0.75 to 0.86)                         | 0.899                                            |
| <b>Emotional symptoms</b>         |                                                                    |                                                                      |                                              |                                                  |
| 6 months                          | -0.42 (-1.23 to 0.38 )                                             | -0,82 ( -1.58 to -0.06 )                                             | -0.39 (-1.5 to 0.71)                         | 0.485                                            |
| 12 months                         | -0.80 (-1.45 to -0.15)                                             | -0.63 ( -1.27 to - 0.00 )                                            | 0.16 (-0.74 to 1.07)                         | 0.721                                            |
| 24 months                         | -0.76 (-1.47 to -0.06)                                             | -0.77 ( -1.41 to - 0.13 )                                            | 0.0 (-0.96 to 0.95)                          | 0.992                                            |
| <b>Conduct problems</b>           |                                                                    |                                                                      |                                              |                                                  |

|                                |                                              |                          |                                      |       |
|--------------------------------|----------------------------------------------|--------------------------|--------------------------------------|-------|
| 6 months                       | -0.46 ( -1.02 to 0.09)                       | -0.11(-0.63 to 0.41 )    | 0.35 (-0.4 to 1.11)                  | 0.359 |
| 12 months                      | -0.11 (-0.56 to 0.33)                        | -0.09( -0.52 to 0.35 )   | 0.03 ( -0.59 to 0.65)                | 0.932 |
| 24 months                      | -0.21 (-0.70 to 0.27)                        | -0.06 (-0.50 to 0.38 )   | 0.15 (-0.5 to 0.8)                   | 0.654 |
| <b>Peer problems</b>           |                                              |                          |                                      |       |
| 6 months                       | -0.11(-0.85 to-0.63)                         | -0.04 (-0.73 to 0.66 )   | 0.07 (-0.95 to 1.09)                 | 0.892 |
| 12 months                      | -0.33 (-0.92 to 0.27)                        | -0.12( - 0.70 to 0.46)   | 0.21 (-0.62 to 1.04)                 | 0.625 |
| 24 months                      | -0.54 (-1.19 to 0.10)                        | -0.36 (-0.95 to 0.23 )   | 0.19 ( -0.69 to 1.06)                | 0.678 |
| <b>Total difficulties</b>      |                                              |                          |                                      |       |
| 6 months                       | -1.38(-3.20 to 0.45)                         | -1.03(-2.74 to 0.68 )    | 0.35 (-2.16 to 2.85)                 | 0.786 |
| 12 months                      | -1.42 (-2.88 to 0.05)                        | -0.96(- 2.39 to 0.47 )   | 0.46 (-1.58 to2.51)                  | 0.659 |
| 24 months                      | -2.25(-3.85 to -0.66)                        | -1.59 (- 3.05 to -0.14 ) | 0.66 (-1.50 to 2.82)                 | 0.550 |
| <b>SDQ Parents Total score</b> | <b>Both treatment groups pooled( 95% KI)</b> |                          | <b>P value -change from baseline</b> |       |
| 3 months                       | -1.20 (-2.44 to 0.04)                        |                          | 0.058                                |       |
| 12 months                      | -1.18 (-2.19 to -0.16 )                      |                          | 0.023                                |       |
| 24 months                      | -1.89 (-2.96 to -0.83 )                      |                          | 0.000                                |       |

Data based on mixed models analysis with single-family intervention as reference group.

\* According to Norwegian version of Strength and Difficulty Questionnaire (23)

<sup>†</sup>P value for equality between groups, group-by-time effect

**Table A3 Changes in self perception profile for children through 24 months in Finnmark Activity School; by treatment group.**

| Self perception profile for children (SPPC) * | Change at follow up(95 % CI)<br>Single-family intervention | Change at follow up(95 % CI)<br>Multiple-family intervention | Between group difference<br>(95% CI) | p value<br>group by<br>time <sup>†</sup> |
|-----------------------------------------------|------------------------------------------------------------|--------------------------------------------------------------|--------------------------------------|------------------------------------------|
| School competence                             |                                                            |                                                              | Koef ( 95% KI)                       |                                          |
| 6 months                                      | 0.05(-0.18 to 0.28)                                        | -0.01 (-0.24 to 0.22 )                                       | -0.06 (-0.38 to 0.27)                | 0.742                                    |
| 12 months                                     | 0.12 ( -0.69 to 0.31)                                      | -0.07 (-0.26 to 0.12 )                                       | -0.18 (-0.45 to 0.08)                | 0.165                                    |
| 24 months                                     | -0.06 (-0.26 to 0.14)                                      | -0.14 (-0.33 to 0.05 )                                       | -0.08(-0.35 to 0.20)                 | 0.576                                    |
| Social acceptanse                             |                                                            |                                                              |                                      |                                          |
| 6 months                                      | 0.04(-0.20 to 0.29)                                        | 0.20 (-0.04 to 0.44 )                                        | 0.16 (0.19 to 0.50)                  | 0.370                                    |
| 12 months                                     | 0.17(-0.03 to 0.37)                                        | 0.14 (-0.06 to 0.33 )                                        | -0.03 (-0.31 to 0.24)                | 0.816                                    |
| 24 months                                     | 0.03 (-0.17 to 0.23)                                       | -0.04 ( -0.24 to 0.16 )                                      | 0.07 (-0.35 to 0.22)                 | 0.651                                    |
| Athletic competence                           |                                                            |                                                              |                                      |                                          |
| 6 months                                      | 0.63(0.34 to 0.91 )                                        | 0.64 (0.36 to 0.92)                                          | 0.01(-0.38 to 0.41)                  | 0.946                                    |
| 12 months                                     | 0.71(0.48 to 0.94)                                         | 0.58 ( 0.35 to 0.81)                                         | -0.13 (-0.45 to 0.20 )               | 0.442                                    |
| 24 months                                     | 0.57 ( 0.33 to 0.81)                                       | 0.44( 0.21 to 0.67)                                          | -0.13 (-0.47 to 0.20)                | 0.439                                    |
| Physical appearance                           |                                                            |                                                              |                                      |                                          |
| 6 months                                      | 0.20 ( -0.6 to 0.46)                                       | -0.07(-0.33 to 0.19)                                         | -0.28 (-0.64 to 0.09)                | 0.144                                    |
| 12 months                                     | 0.17 (-0.04 to 0.38)                                       | 0.12(-0.10 to 0.33)                                          | -0.06 (-0.35 to 0.24)                | 0.718                                    |
| 24 months                                     | 0.11 (-0.11 to 0.34)                                       | -0.19 ( -0.40 to 0.03)                                       | -0.30 (-0.61 to 0.01)                | 0.056                                    |
| Behavioural conduct                           |                                                            |                                                              |                                      |                                          |
| 6 months                                      | 0.03(-0.19 to 0.25)                                        | 0.13 (-0.09 to 0.36)                                         | 0.10( (-0.21 to 0.42)                | 0.523                                    |
| 12 months                                     | 0.16 (-0.02 to 0.34)                                       | 0.17 (-0.01 to 0.35)                                         | 0.01 ( -0.25 to 0.27)                | 0.945                                    |
| 24 months                                     | -0.04 (-0.15 to 0.23)                                      | 0.03 (-0.15 to 0.21)                                         | 0.01 (-0.27 to 0.26)                 | 0.968                                    |
| <b>Self worth</b>                             |                                                            |                                                              |                                      |                                          |
| 6 months                                      | -0.11(-0.32 to 0.10)                                       | -0.11(-0.32 to 0.10)                                         | 0 (-0.30 to 0.30)                    | 0.993                                    |
| 12 months                                     | 0.03 (-0.14 to 0.20)                                       | 0.06 (-0.11 to 0.23 )                                        | 0.04 (-0.21 to 0.28)                 | 0.770                                    |
| 24 months                                     | -0.04 ( -0.22 to 0.14)                                     | -0.14 (-0.32 to 0.04 )                                       | -0.1 (-0.36 to 0.16)                 | 0.448                                    |

Data based on mixed models analysis with single-family intervention as reference group.

\* According to Norwegian version of Harter Self- Perception Profile for Children (24)

<sup>†</sup>P value for equality between groups, group-by-time effect

**Table A4 Changes in self reported and parent reported quality of life (KINDL) through 24 months by treatment group and pooled effects. Finnmark Activity School**

| Quality of life<br>Self reported KINDL* | Change at follow up(95 % CI)<br>Single-family intervention | Change at follow up(95 % CI)<br>Multiple-family intervention | Between group difference<br>(95% CI) | p value<br>group by<br>time <sup>†</sup> |
|-----------------------------------------|------------------------------------------------------------|--------------------------------------------------------------|--------------------------------------|------------------------------------------|
| <b>Total</b>                            |                                                            |                                                              |                                      |                                          |
| 6 months                                | 0.20 (-5.14 to 5.54)                                       | 0.95(-4.41 to 6.31 )                                         | 0.75 (-6.82 to 8.32)                 | 0.846                                    |
| 12 months                               | 4.43 (-0.21 to 9.07)                                       | 2.64(-1.48 to 6.75 )                                         | -1.80 (-8.00 to 4.41)                | 0.570                                    |
| 24 months                               | -0.68 (-5.31 to 3.96)                                      | -1.45(-5.61 to 2.70 )                                        | -0.78 (-7.00 to 5.45)                | 0.807                                    |
| <b>Parent reported KINDL*</b>           |                                                            |                                                              |                                      |                                          |
| <b>Total</b>                            |                                                            |                                                              |                                      |                                          |
| 6 months                                | -1.93 (-6.43 to 2.57)                                      | 3.01 (-0.79 to 6.80)                                         | 4.94 (-0.95 to 10.82)                | 0.100                                    |
| 12 months                               | 0.32 (-3.05 to 3.68)                                       | 2.99 (-0.28 to 6.25)                                         | 2.67 (-2.02 to 7.36)                 | 0.264                                    |
| 24 months                               | 1.61 (-1.85 to 5.07)                                       | 2.27 (-0.95 to 5.48)                                         | 0.66 (-4.06 to 5.38)                 | 0.784                                    |
| <b>Physical</b>                         |                                                            |                                                              |                                      |                                          |
| 6 months                                | -3.47 (-11.72 to 4.79)                                     | 6.40 (-1.39 to 14.20)                                        | 9.87 (-1.48 to 21.23)                | 0.088                                    |
| 12 months                               | 4.58 (-2.16 to 11.33)                                      | 3.05 (-3.57 to 9.67 )                                        | -1.53 (-10.98 to 7.92)               | 0.751                                    |
| 24 months                               | 4.39 (-2.84 to 11.63)                                      | 1.84 (-4.87 to 8.56 )                                        | -2.55 (-12.42 to 7.32)               | 0.613                                    |
| <b>Emotions</b>                         |                                                            |                                                              |                                      |                                          |
| 6 months                                | 0.01 (-6.35 to 6.36)                                       | 5.49 (-0.10 to 11.08 )                                       | 5.49 (-2.98 to 13.95)                | 0.204                                    |
| 12 months                               | 1.06 (-3.83 to 5.94)                                       | 1.85 (-2.88 to 6.59)                                         | 0.80 (-6.01 to 7.60)                 | 0.819                                    |
| 24 months                               | 0.17 (-5.00 to 5.34)                                       | 5.30 (0.54 to 10.06)                                         | 5.13 (-1.90 to 12.16)                | 0.153                                    |
| <b>Self esteem</b>                      |                                                            |                                                              |                                      |                                          |
| 6 months                                | -2.79 (-9.04 to 3.47)                                      | 2.13(-3.73 to 8.00 )                                         | 4.92 (-3.66 to 13.50)                | 0.261                                    |
| 12 months                               | -1.36 (-6.49 to 3.78)                                      | 5.38(0.46 to 10.31)                                          | 6.74 (-0.37 to 13.85)                | 0.063                                    |
| 24 months                               | 5.15 (-0.25 to 10.55)                                      | 1.27 (-3.63 to 6.17)                                         | -3.88 (-11.18 to 3.41)               | 0.297                                    |

|                                  |                                               |                       |                                      |       |
|----------------------------------|-----------------------------------------------|-----------------------|--------------------------------------|-------|
| <b>Family</b>                    |                                               |                       |                                      |       |
| 6 months                         | 0.32(-5.02 to 5.65 )                          | 1.30 (-3.69 to 6.29)  | 0.99(-6.32 to 8.29)                  | 0.791 |
| 12 months                        | 1.22 (-3.04 to 5.48)                          | 0.71 (-3.55 to 4.97 ) | -0.51 (-6.54 to 5.51)                | 0.867 |
| 24 months                        | -0.23 (-4.84 to 4.37)                         | 2.23 (-2.01 to 6.48)  | 2.46 ( -3.80 to 8.72)                | 0.441 |
| <b>Friends</b>                   |                                               |                       |                                      |       |
| 6 months                         | -1.58 (-6.87 to 3.71)                         | 3.13(-1.67 to 7.93)   | 4.70 (-2.44 to 11.85)                | 0.197 |
| 12 months                        | 0.41 (-3.78 to 4.61 )                         | 2.91(-1.21 to 7.02 )  | 2.49 (-3.38 to 8.37)                 | 0.406 |
| 24 months                        | 2.09 (-2.38 to 6.55)                          | 1.35 (-2.75 to 5.46)  | -0.73 (-6.80 to 5.34)                | 0.813 |
| <b>School</b>                    |                                               |                       |                                      |       |
| 6 months                         | -1.22 (-6.65 to 4.21)                         | -2.21 (-7.19 to 2.77) | -0.99(-8.36 to 6.37)                 | 0.792 |
| 12 months                        | 0.37 (-4.03 to 4.76)                          | 3.63 (-0.66 to 7.92 ) | 3.27 (-2.88 to 9.41)                 | 0.297 |
| 24 months                        | -0.57 (-5.10 to 3.96)                         | 2.01 (-2.21 to 6.24)  | 2.58 (-3.61 to 8.78)                 | 0.414 |
| <b>KINDL Child Total score</b>   | <b>Both treatment groups pooled ( 95% CI)</b> |                       | <b>P value -change from baseline</b> |       |
| 6 months                         | 0.53 (-3.21 to 4.27 )                         |                       | 0.781                                |       |
| 12 months                        | 3.39 (0.34 to 6.43)                           |                       | 0.029                                |       |
| 24 months                        | -1.16 (-4.22 to 1.90)                         |                       | 0.457                                |       |
| <b>KINDL Parents Total score</b> | <b>Both treatment groups pooled ( 95% CI)</b> |                       | <b>P value -change from baseline</b> |       |
| 6 months                         | 0.92 (-1.96 to 3.81)                          |                       | 0.531                                |       |
| 12 months                        | 1.67 (-0.67 to 4.02 )                         |                       | 0.161                                |       |
| 24 months                        | 1.90 (-0.45 to 4.25 )                         |                       | 0.113                                |       |

Data based on mixed models analysis with single-family intervention as reference group.

\* According to Norwegian version of “Kinder Lebensqualität Fragebogen” KINDL (25)

†P value for equality between groups, group-by-time effect

**Figure A1 Parent and self- reported mental health (SDQ) emotional symptoms from baseline to 24 months by intervention group. Finnmark Activity School**

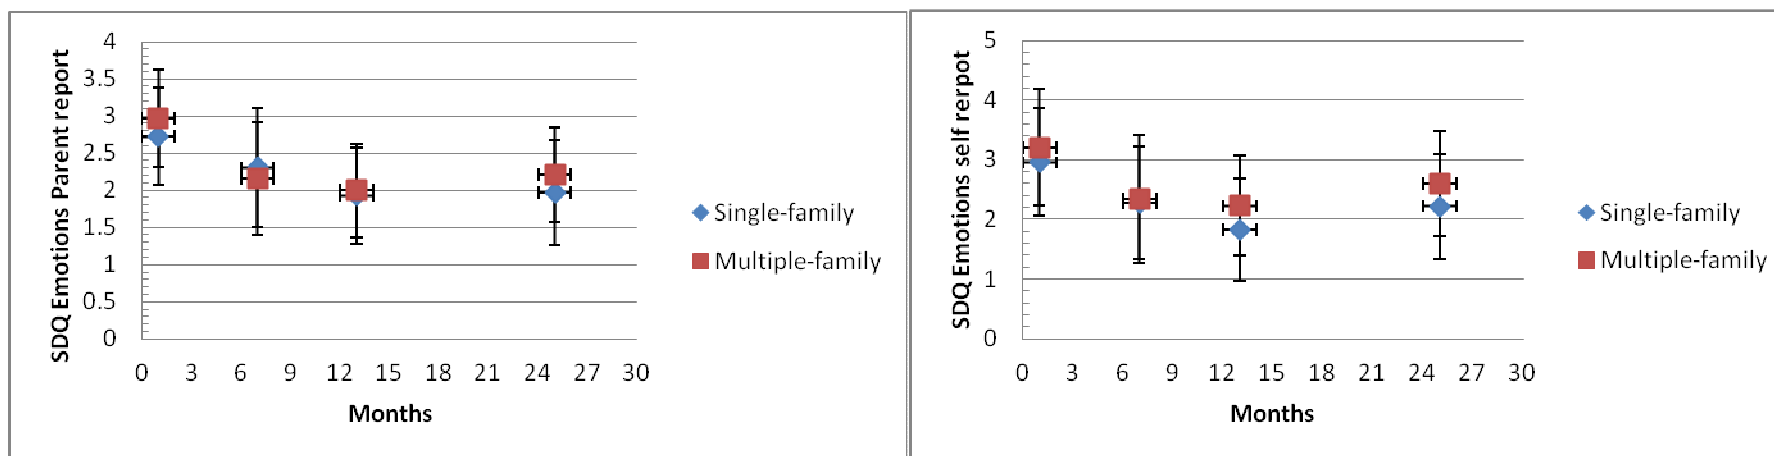

Mean (95% CI) changes in SDQ score emotional symptoms from baseline to 24- months follow up by intervention group.



**Figure A2 Parent and self- reported mental health (SDQ) peer problem. Finnmark Activity School**

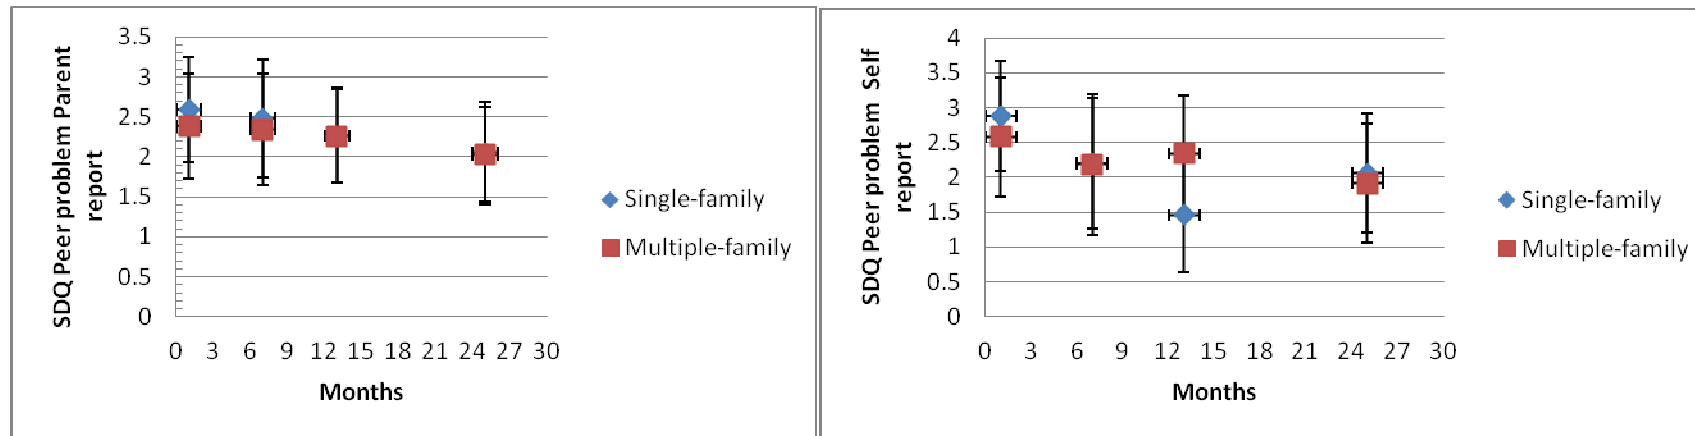

Mean (95% CI) changes in SDQ score peer problem from baseline to 24- months follow up by intervention group.

**Figure A 3 Self esteem, athletic competences. Finnmark Activity School**

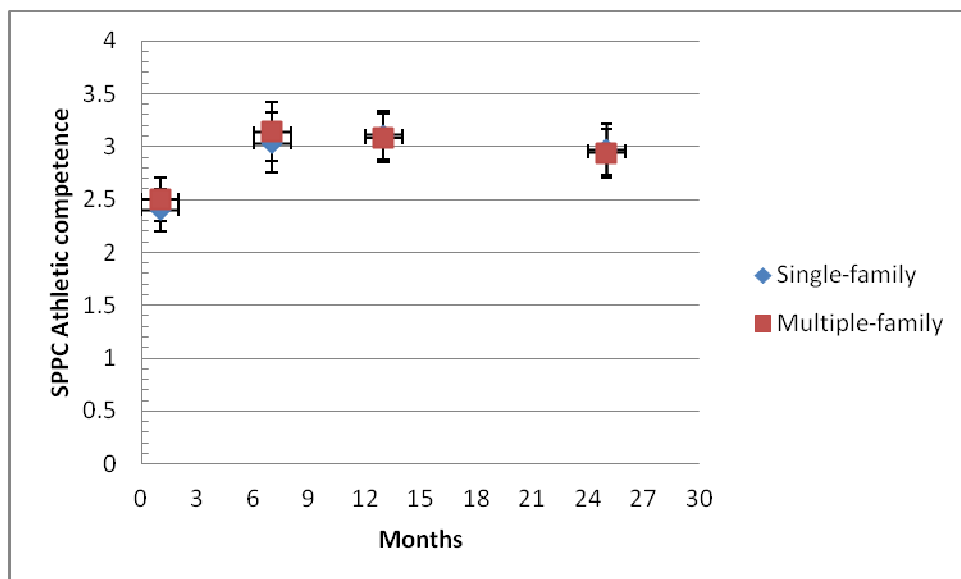

Mean (95% CI) changes in Self Perception Profile, athletic competence from baseline to 24- months follow -up by intervention group.
